# Supplementary material for: Selective excitation of Eu3+in the core of small β-NaGdF4nanocrystals
Source: Royal Society of Chemistry journal article supplement (doi:10.1039/c2tc00132b), 2012-11-15
Supplement: c2tc00132b.pdf [file c2tc00132b.pdf]

## Supporting Information

### Selective Excitation of $\text{Eu}^{3+}$ in the Core of Small $\beta\text{-NaGdF}_4$ Nanocrystals

Mateusz Banski,<sup>a</sup> Artur Podhorodecki,<sup>\*a</sup> Jan Misiewicz,<sup>a</sup> Mohammad Afzaal,<sup>b</sup> Ahmed Lutfi Abdelhady<sup>c</sup> and Paul O'Brien<sup>c</sup>

<sup>a</sup> Institute of Physics, Wrocław University of Technology Wrocław, 50-370, Poland.

<sup>b</sup> Center of Research Excellence in Renewable Energy King Fahd University of Petroleum and Minerals, PO Box 1292, Dhahran, 31261, Saudi Arabia

<sup>c</sup> The Manchester Materials Science Centre and School of Chemistry, The University of Manchester, Manchester, M13 9PL, United Kingdom

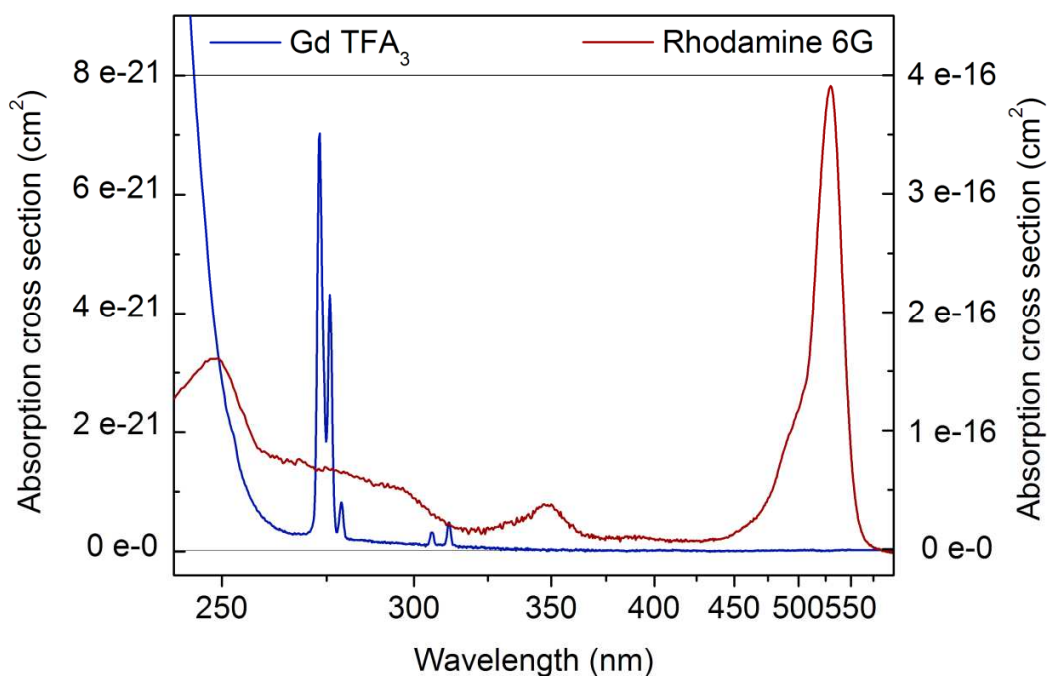

Figure S1. Absorption cross section ( $\sigma$ ) of gadolinium trifluoroacetates ( $\text{Gd TFA}_3$ ), precursor used in NCs synthesis, and commonly used organic fluorophore (Rhodamine 6G).

Table 1S. Calculated absorption cross section ( $\sigma$ ) of NaGdF<sub>4</sub> NCs containing different amount of Gd<sup>3+</sup>.  $\sigma$  of Rhodamine 6G is given for comparison.

|                                  | NaGdF <sub>4</sub>    |                       |                       |                       | Rhodamine 6G       |
|----------------------------------|-----------------------|-----------------------|-----------------------|-----------------------|--------------------|
| NC diameter [nm]                 | 3.0                   | 5.2                   | 11.0                  | 21.0                  | 1 molecule         |
| Number of Gd <sup>3+</sup> in NC | ~200                  | ~1 000                | ~10 000               | ~65 000               |                    |
| $\sigma$ (cm <sup>2</sup> )      | $1,40 \cdot 10^{-18}$ | $7,00 \cdot 10^{-18}$ | $7,00 \cdot 10^{-17}$ | $4,55 \cdot 10^{-16}$ | $4 \cdot 10^{-16}$ |
